# Supplementary material
Source: Springer Nature journal article supplement (https://www.springermedizin.de/resource/supplementary/12958_2009_568_MOESM4_ESM.pdf/9568326)
Supplement: MOESM4 [file 9568326]

Primer set 1

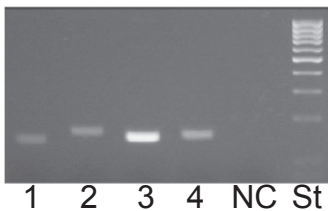

Prostate

1 2 3 4 NC St

Primer set 2

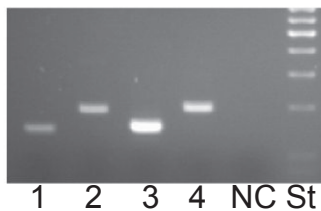

25 cycles

1 2 3 4 NC St

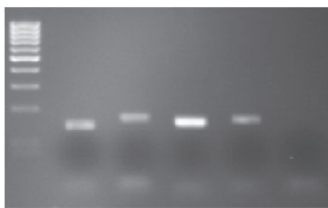

Seminal  
Vesicle

St 1 2 3 4 NC

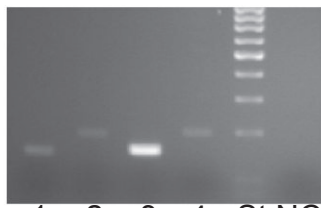

35 cycles (left)

30 cycles (right)

1 2 3 4 St NC

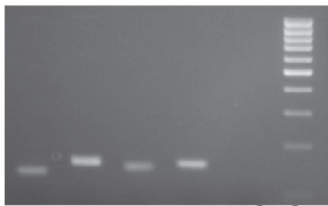

Testis

1 2 3 4 NC St

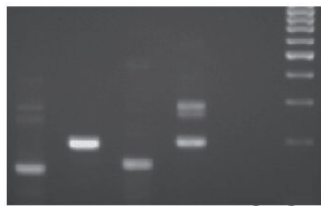

35 cycles

1 2 3 4 NC St
